# Supplementary material for: Oxalate metal–organic framework derived atomic Ru3+-doped Co(OH)2nanosheets for a highly efficient hydrogen evolution reaction
Source: Royal Society of Chemistry journal article supplement (doi:10.1039/d2se01664h), 2023-01-01
Supplement: d2se01664h1.pdf [file d2se01664h1.pdf]

**Oxalate metal organic framework-derived Ru<sup>3+</sup>-doped Co(OH)<sub>2</sub> nanosheets for  
highly efficient hydrogen evolution reaction**

Yizhong Zou,<sup>a,†</sup> Wen-Da Zhang,<sup>a,†</sup> Minghan Hu,<sup>b</sup> Zhe Zhang,<sup>a</sup> Jiangyong Liu,<sup>c</sup> Zhi-Guo Gu<sup>a</sup> and Xiaodong Yan<sup>\*a</sup>

<sup>a</sup> Key Laboratory of Synthetic and Biological Colloids, Ministry of Education, School of Chemical and Material Engineering, Jiangnan University, Wuxi 214122, China

<sup>b</sup> Department of Materials, ETH Zürich, Zürich 8093, Switzerland

<sup>c</sup> School of Chemistry and Chemical Engineering, Yangzhou University, Yangzhou 225002, China

<sup>†</sup> These authors contributed equally.

E-mail: [xiaodong.yan@jiangnan.edu.cn](mailto:xiaodong.yan@jiangnan.edu.cn)

## Experimental section

**Materials.** Cobalt chloride hexahydrate ( $\text{CoCl}_2 \cdot 6\text{H}_2\text{O}$ , 99%), sodium oxalate ( $\text{Na}_2\text{C}_2\text{O}_4$ , 99.5%), Ruthenium chloride trihydrate ( $\text{RuCl}_3 \cdot 3\text{H}_2\text{O}$ , 97%), hydrochloric acid ( $\text{HCl}$ , 37.5%), ethanol ( $\text{CH}_3\text{CH}_2\text{OH}$ , 99.5%), acetone ( $\text{C}_3\text{H}_6\text{O}$ , 99.5%) were purchased from Sinopharm Chemical Reagent Co. Ltd. Potassium hydroxide ( $\text{KOH}$ , 95%) were purchased from Shanghai Macklin Biochemical Co. Ltd. Nickel foam (NF) with a thickness of 2 mm was purchased from Suzhou Wingrise Energy Technology Co., Ltd. Deionized water has a specific resistance of  $> 18.2 \text{ M}\Omega \text{ cm}$ . All chemicals were purchased from commercial sources and used without further purification.

### Synthesis of, $\text{Ru-CoC}_2\text{O}_4\text{-2}$

First, a pieces of NF ( $1 \times 3 \text{ cm}^2$ ) was washed with 3 M hydrochloric acid for 10 minutes to remove the oxide layer from the surface of the NF, and then washed sequentially with ethanol, acetone, and deionized water for 10 minutes to remove the possible organic contaminants. Next, 237 mg  $\text{CoCl}_2 \cdot 6\text{H}_2\text{O}$ , 67 mg  $\text{NaC}_2\text{O}_4$ , and 20 mg  $\text{RuCl}_3 \cdot 3\text{H}_2\text{O}$  were dissolved into 10 ml deionized water, then sonicated for 10 min to make them completely dissolved. The cleaned NF was added into the above solution, which was sealed and maintained in an oven at  $120^\circ \text{C}$  for 6 h. The products were washed successively with deionized water and ethanol, and then transferred to the oven at  $60^\circ \text{C}$  for drying. For the comparative study, the  $\text{CoC}_2\text{O}_4$ ,  $\text{Ru-CoC}_2\text{O}_4\text{-1}$  and  $\text{Ru-CoC}_2\text{O}_4\text{-3}$  were produced by using different qualities of 0 mg, 10 mg and 30mg  $\text{RuCl}_3 \cdot 3\text{H}_2\text{O}$ , respectively.

### Synthesis of, $\text{Ru-Co(OH)}_2\text{-2}$

2.95g  $\text{KOH}$  was dissolved in 10 ml deionized water to form solution. the  $\text{Ru-CoC}_2\text{O}_4\text{-2}$  were converted to  $\text{Ru-Co(OH)}_2\text{-2}$  by placing them in above solution for 15 min, and the samples were washed successively with deionized water and ethanol. Different concentrations of ruthenium-doped cobalt hydroxide were named as  $\text{Co(OH)}_2$ ,  $\text{Ru-Co(OH)}_2\text{-1}$ ,  $\text{Ru-Co(OH)}_2\text{-3}$ .

### Physical characterization

XRD characterization was performed on a Bruker D8 Venture diffractometer (Bruker Corporation, faaa USA) using a  $\text{Cu-K}\alpha$  radiation source ( $\lambda = 1.54178 \text{ \AA}$ ) at a scan rate of  $5^\circ \text{ min}^{-1}$ . The morphology was examined using the Hitachi S-4800 high-resolution scanning electron microscope (SEM, Hitachi ltd., Japan) and JEM-2100 high-resolution transmission electron microscope (HRTEM, JEOL ltd., Japan) equipped with energy dispersive spectroscopy (EDS) system. SEM and TEM were operated at

5 and 200 kV, respectively. XPS measurements were performed on an AXIS SUPRA, The data of all samples were calibrated by C 1s to 284.8 eV. Raman measurements were performed on a Renishaw inVia reflex Raman microscope equipped with a 785 nm laser (Renishaw, UK). *In situ* Raman data were recorded on the above-mentioned Raman microscope under controlled potentials by electrochemical workstation. The cell was made of Teflon and covered with a round quartz glass to protect the objective. Platinum wire and Hg/HgO electrode were used as counter and reference electrodes, respectively. Raman data were obtained at potentials of, 0, -0.8, -1.0, and -1.2 V vs. Hg/HgO, and the dwell time at each potential was 5 min. Inductively coupled plasma (ICP) coupled with optical emission spectrometry (OES) analysis was conducted using a PerkinElmer 8300.

### **Electrochemical measurement**

Electrochemical measurements were performed at room temperature. A three-electrode system was used to attach to a CHI760E Electrochemical workstation (Shanghai Chenhua Instrument Co., LTD.). 1.0 mol/l KOH was used as an electrolyte. Hg/HgO electrode and carbon rod were used as reference electrode and counter electrode, respectively. The electrocatalytic performance was studied by linear sweep voltammetry (LSV). Polarization curves were obtained at a sweep rate of 5 mV/s. All polarization curves were with iR-corrected. In all measurements, the reference electrode was calibrated with respect to reversible hydrogen electrode (RHE). Electrochemical impedance spectroscopy (EIS) was performed between 0.1 Hz and 100 kHz. To measure the double layer capacitance, cyclic voltammetry (CV) curves were measured at 20, 40, 60, 80, and 100 mV s<sup>-1</sup>. The electrochemical stability of the prepared Ru-Co(OH)<sub>2</sub>-2 was evaluated by chronopotential measurement. All LSV curves were scanned from negative to positive at a scan rate of 10 mV s<sup>-1</sup>. The potentials against the Hg/HgO electrode were converted to the RHE reference scale by:  $E \text{ (V vs. RHE)} = E \text{ (V vs. Hg/HgO)} + 0.059 \times \text{pH} + 0.098$ .

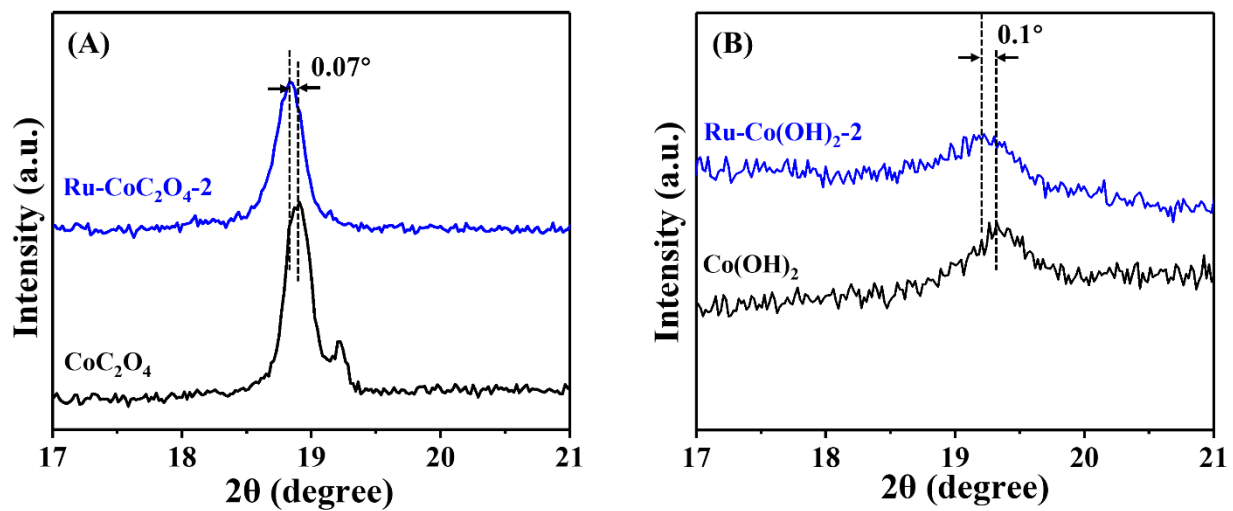

Fig. S1 Magnified XRD pattern of (A)  $\text{CoC}_2\text{O}_4$  and  $\text{Ru-CoC}_2\text{O}_4\cdot 2$  and (B)  $\text{Co(OH)}_2$  and  $\text{Ru-Co(OH)}_2\cdot 2$ .



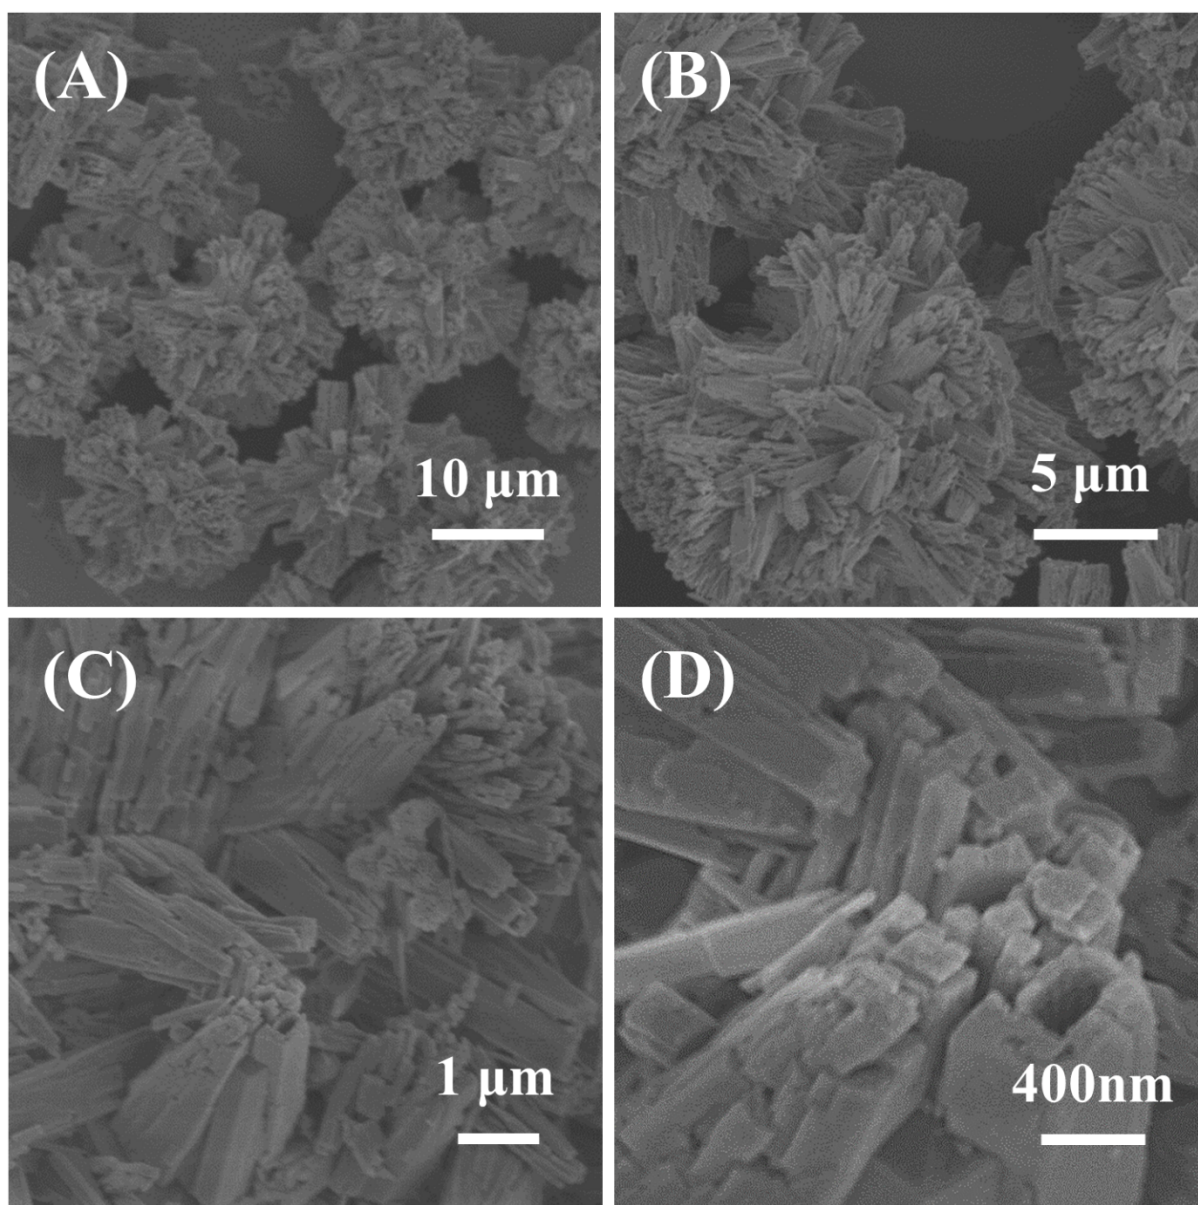

Fig. S2 SEM images of Ru-CoC<sub>2</sub>O<sub>4</sub>-2.

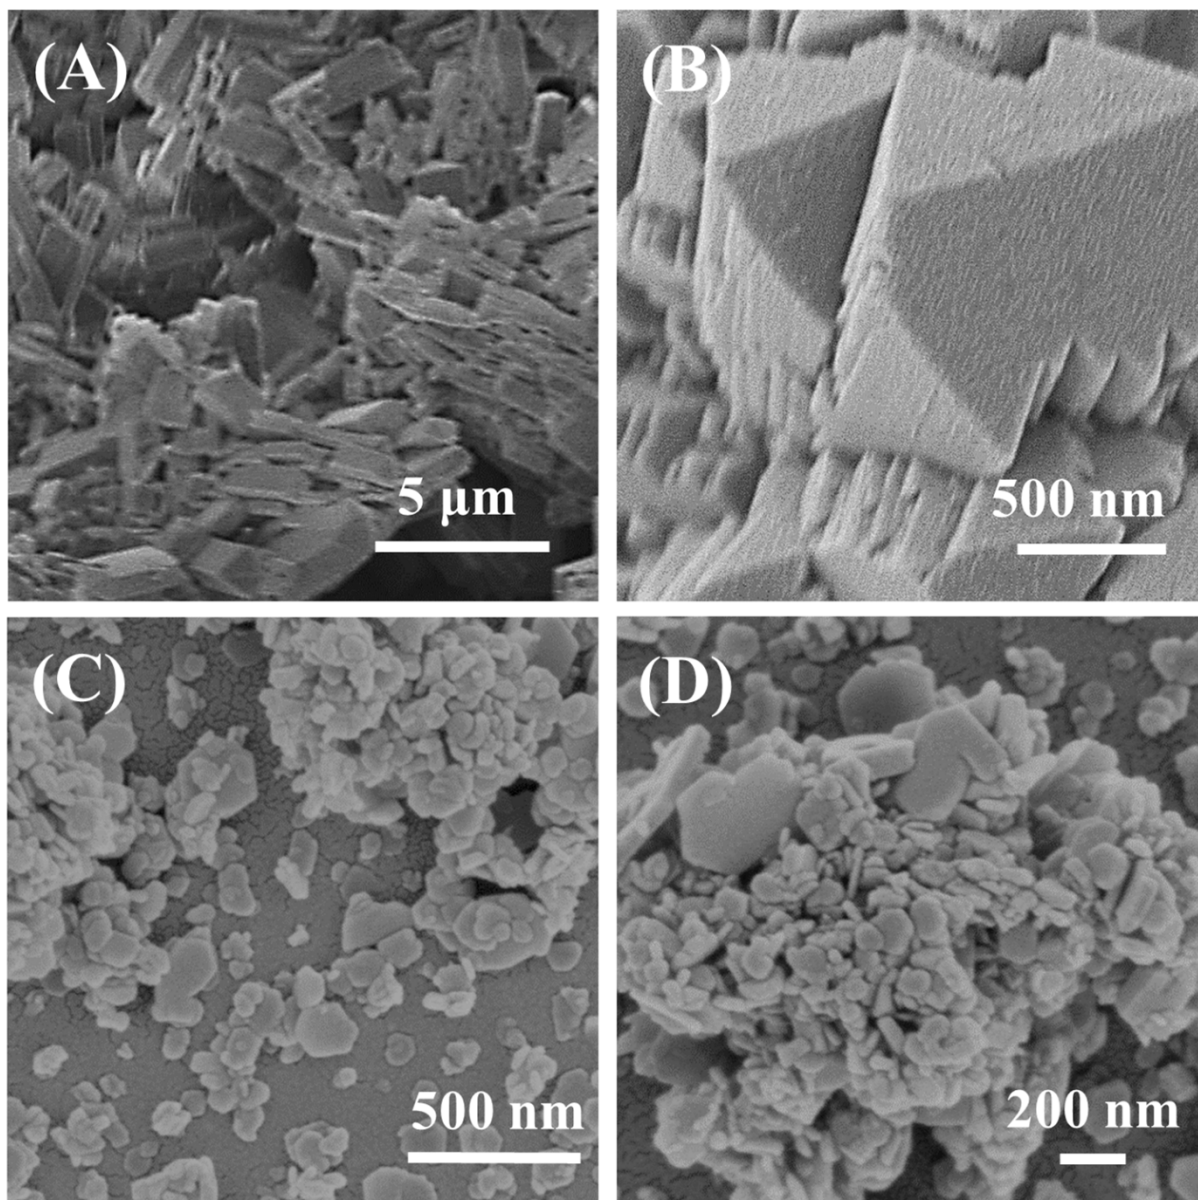

Fig. S3 SEM images of (A-B)  $\text{CoC}_2\text{O}_4$  and (C-D)  $\text{Co(OH)}_2$ .

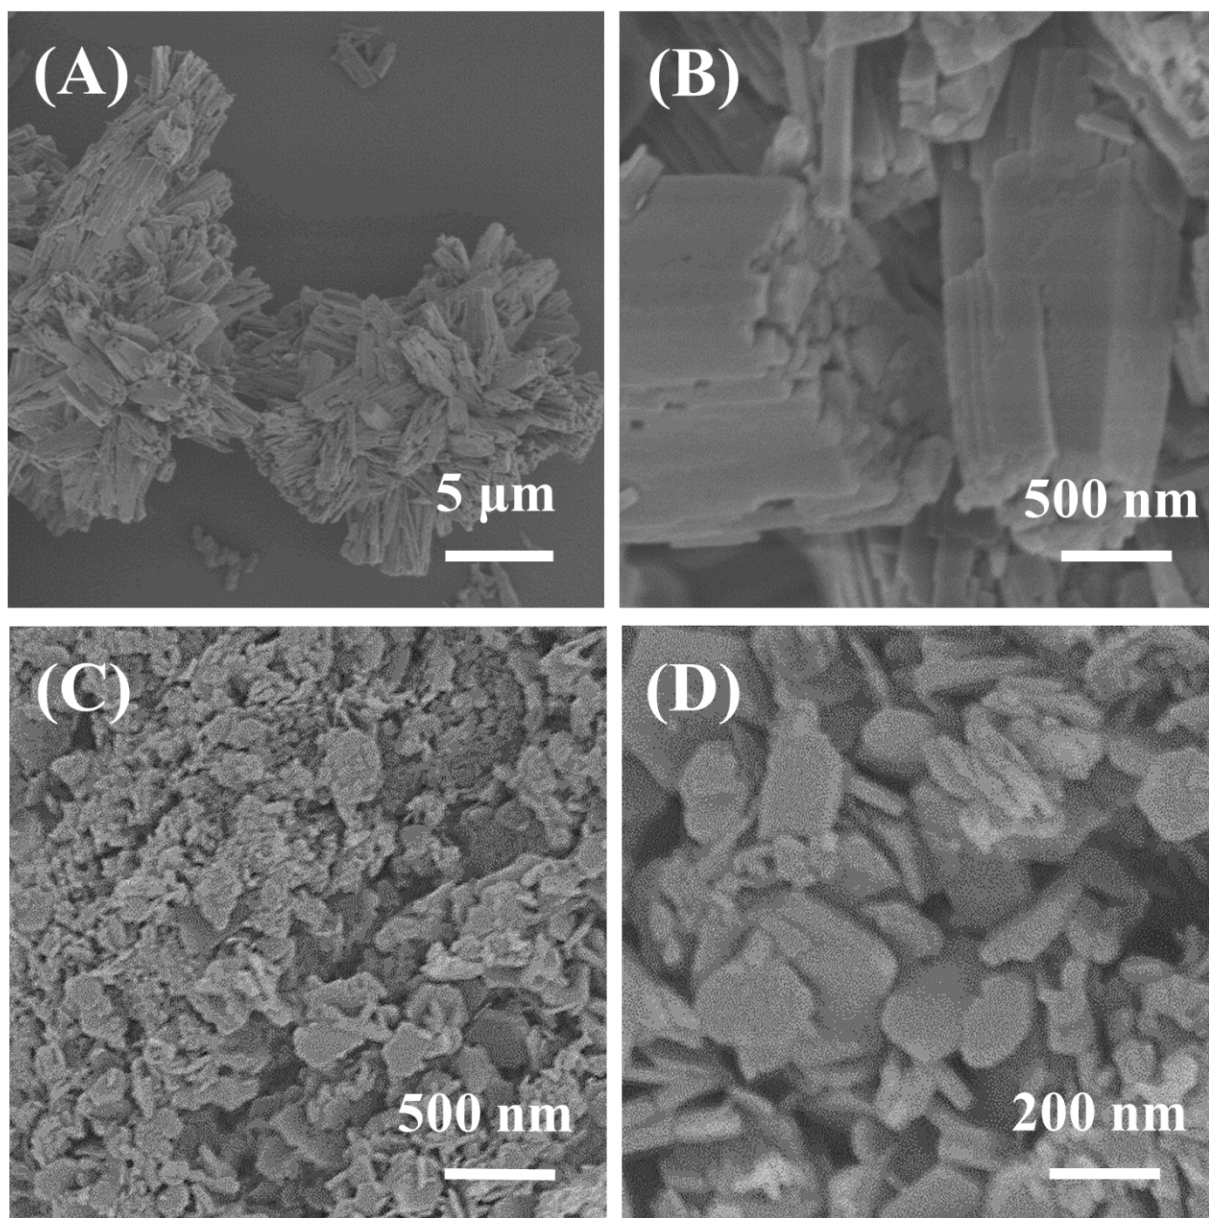

Fig. S4 SEM images of (A-B) Ru-CoC<sub>2</sub>O<sub>4</sub>-1 and (C-D) Ru-Co(OH)<sub>2</sub>-1.

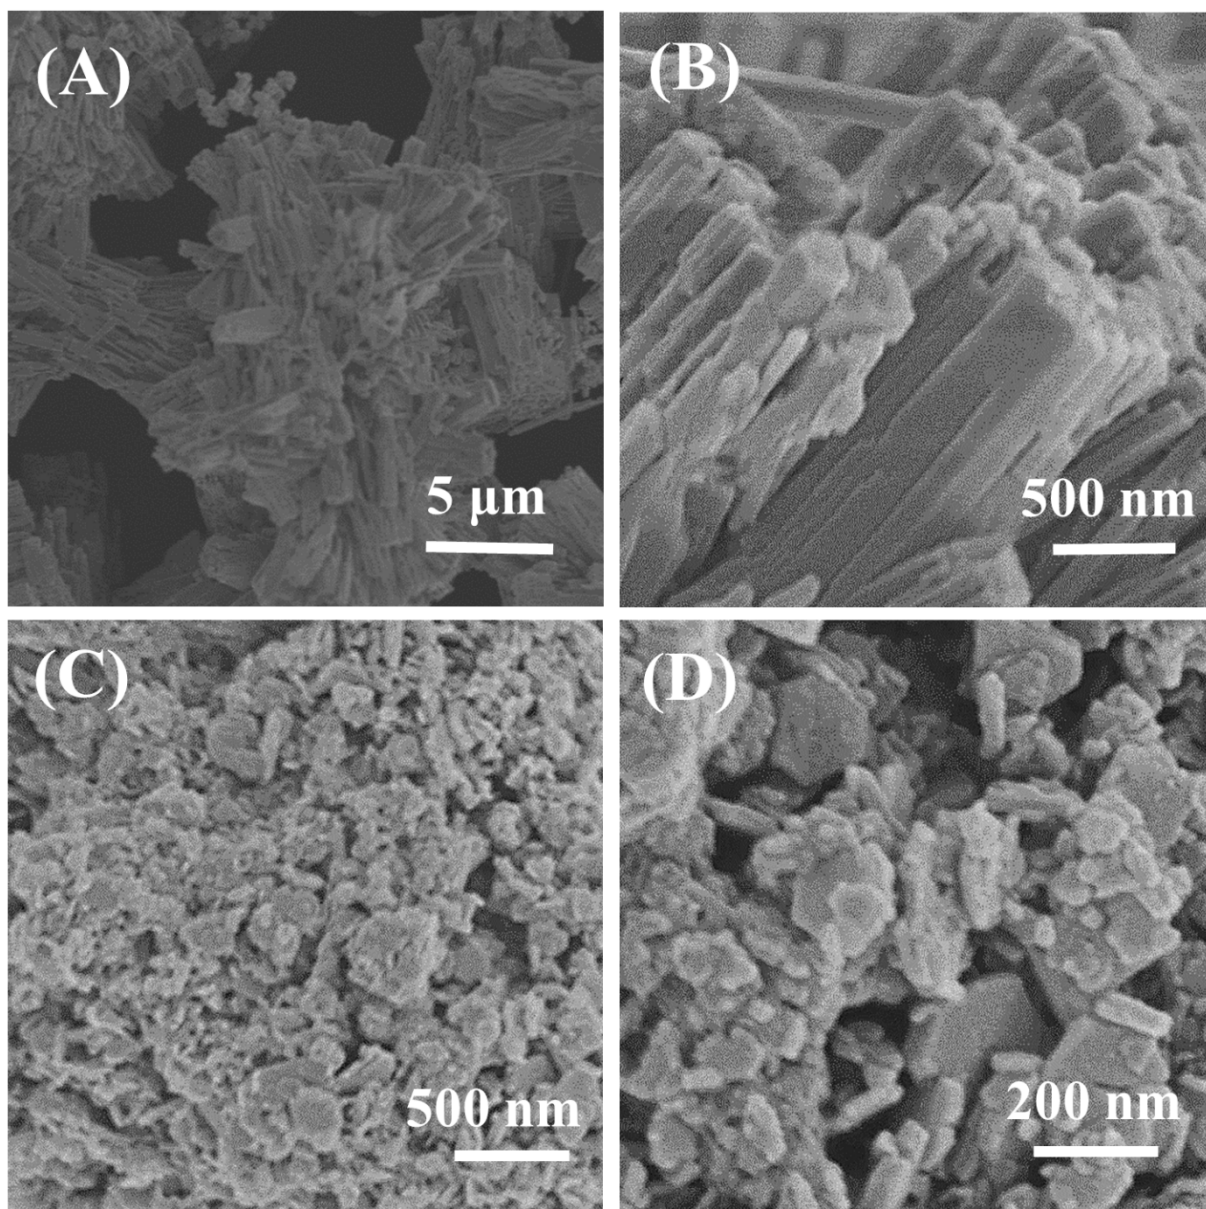

Fig. S5 SEM images of (A-B) Ru-CoC<sub>2</sub>O<sub>4</sub>-3 and (C-D) Ru-Co(OH)<sub>2</sub>-3.



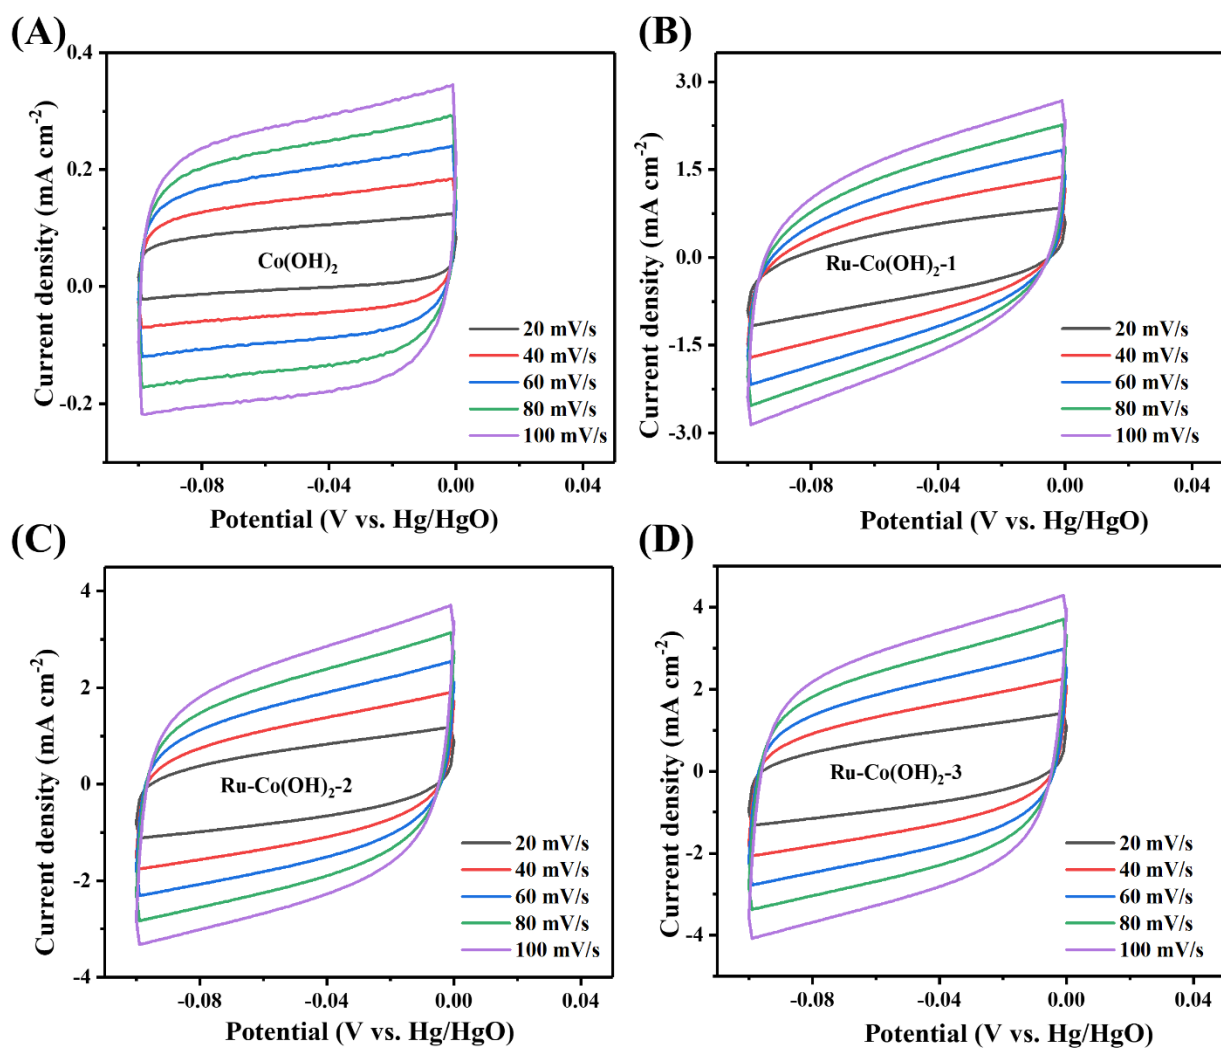

Fig. S6 Cyclic voltammetry profiles for (A)  $\text{Co(OH)}_2$ , (B)  $\text{Ru-Co(OH)}_2\text{-1}$ , (C)  $\text{Ru-Co(OH)}_2\text{-2}$  and (D)  $\text{Ru-Co(OH)}_2\text{-3}$  in 1.0 M KOH solution.

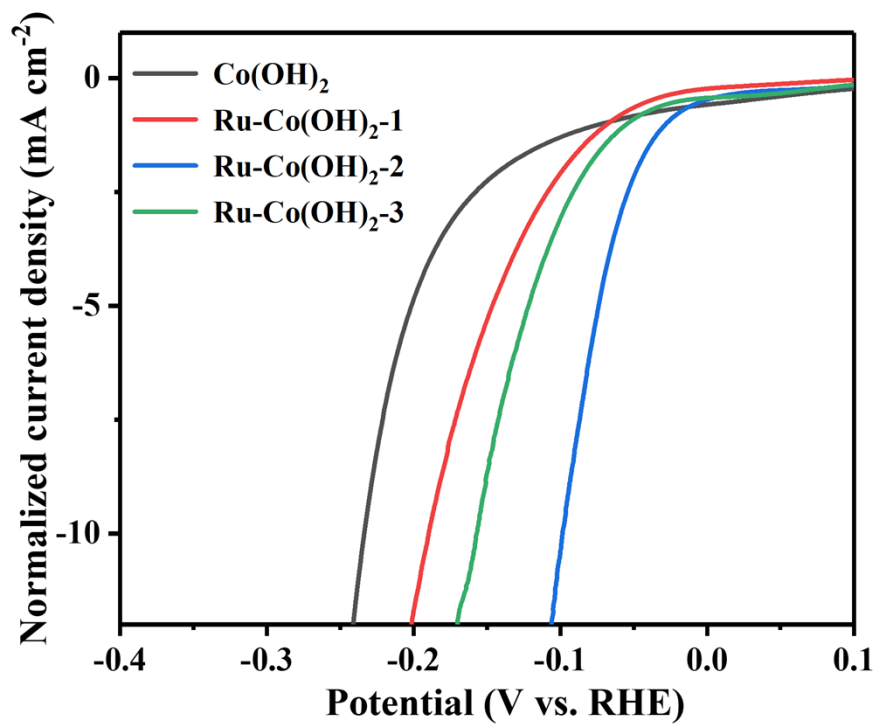

Fig. S7 ECSA-normalized LSV curves of the Co(OH)<sub>2</sub>, Ru-Co(OH)<sub>2</sub>-1, Ru-Co(OH)<sub>2</sub>-2 and Ru-Co(OH)<sub>2</sub>-3 in 1.0 M KOH solution.

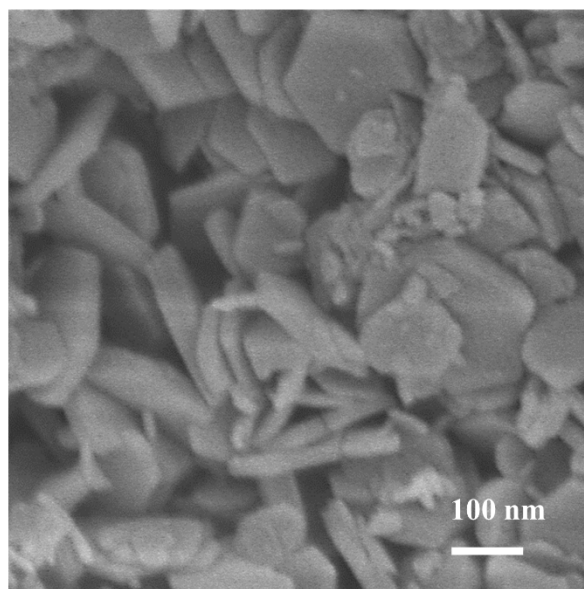

Fig. S8 SEM image of Ru-Co(OH)<sub>2</sub>-2 after the HER performance testing.

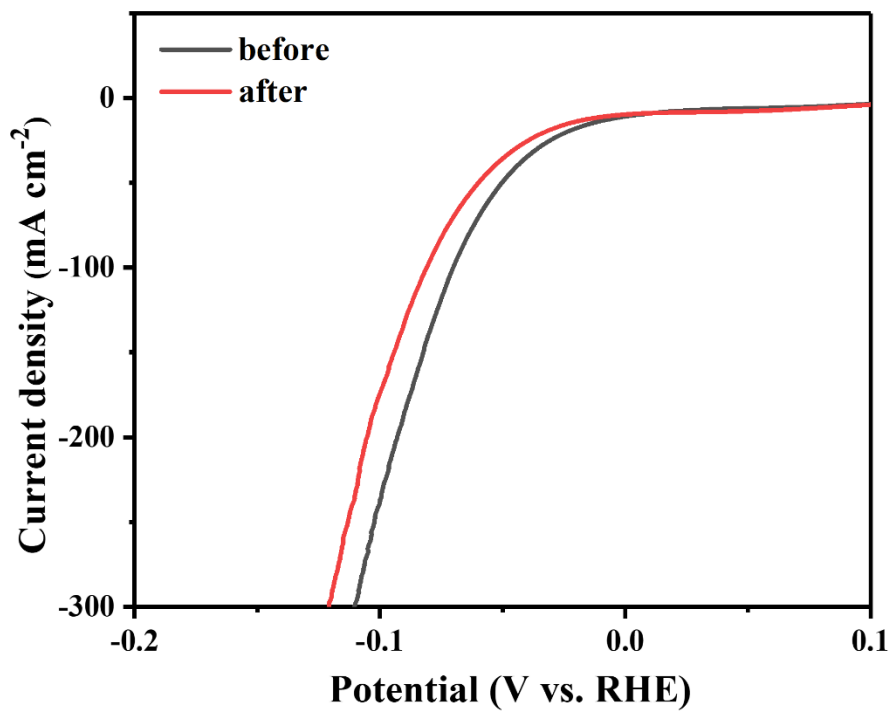

Fig. S9 LSV curves of the Ru-Co(OH)<sub>2</sub>-2 before and after the stability test.

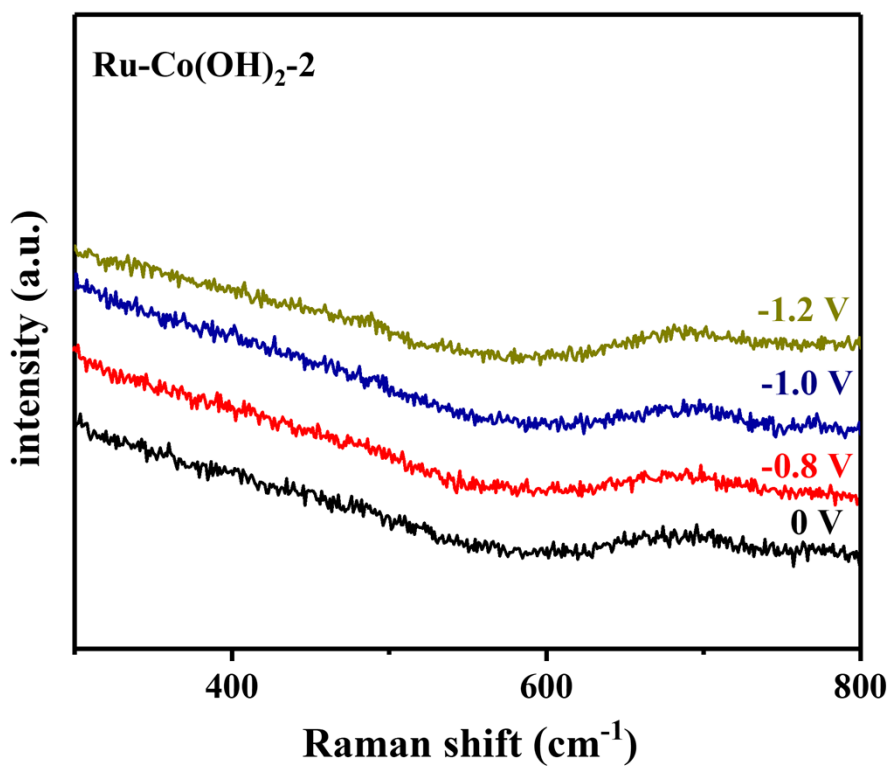

Figure S10 *In-situ* Raman spectra of Ru-Co(OH)<sub>2</sub>-2 from -0.8 to -1.2 V vs. Hg/HgO.

**Table S1. The Ru contents in different electrocatalysts measured by ICP-OES**

| Electrocatalysts          | Ru Content (wt%) |
|---------------------------|------------------|
| Ru-Co(OH) <sub>2</sub> -1 | 2.8              |
| Ru-Co(OH) <sub>2</sub> -2 | 5.1              |
| Ru-Co(OH) <sub>2</sub> -3 | 7.3              |

**Table S2. Comparison of the HER performances of different Ru-based electrocatalysts in 1.0 M KOH**

| Sample                                                | Overpotential (mV)<br>at 30 mA cm <sup>-2</sup> | Tafel slope<br>(mV dec <sup>-1</sup> ) | References |
|-------------------------------------------------------|-------------------------------------------------|----------------------------------------|------------|
| Ru-Co(OH) <sub>2</sub> -2                             | 36                                              | 65                                     | This work  |
| Ru@C                                                  | 160                                             | 96                                     | 1          |
| RuNi <sub>1</sub> Co <sub>1</sub> @CMT                | 147                                             | 77                                     | 2          |
| CoRu-O/A@HNC-2                                        | 140                                             | 73                                     | 3          |
| Co/Se-MoS <sub>2</sub> -NFs                           | 110                                             | 70                                     | 4          |
| B-CoP/CNT                                             | 90                                              | 80                                     | 5          |
| RuCoP@CN                                              | 80                                              | 98                                     | 6          |
| Ru/Co <sub>3</sub> O <sub>4</sub> NWs                 | 80                                              | 70                                     | 7          |
| Ru <sub>38</sub> Pd <sub>34</sub> Ni <sub>28</sub> /C | 55                                              | 65                                     | 8          |
| Co <sub>5</sub> Ru <sub>1</sub> @NCNT/PF              | 50                                              | 65                                     | 9          |
| Pd-Ru@NG                                              | 50                                              | 73                                     | 10         |
| Ru/CoO NRs                                            | 100                                             | 70                                     | 11         |
| Ru-CMOP                                               | 80                                              | 96                                     | 12         |
| Co NPs@Ru SAs/NC                                      | 98                                              | 84                                     | 13         |
| Cu-RuS <sub>2</sub> /Ru                               | 98                                              | 70                                     | 14         |
| Ru/S-rGO-8                                            | 85                                              | 68                                     | 15         |
| P-Ru-CoNi-LDH                                         | 65                                              | 69                                     | 16         |

## References

1. M. Yang, T. Feng, Y. Chen, J. Liu, X. Zhao and B. Yang, *Appl. Catal. B*, 2020, **267**, 118657.
2. Y. Xue, Q. Yan, X. Bai, Y. Xu, X. Zhang, Y. Li, K. Zhu, K. Ye, J. Yan, D. Cao and G. Wang, *J. Colloid Interf. Sci.*, 2022, **612**, 710-721.
3. G. Li, K. Zheng, W. Li, Y. He and C. Xu, *ACS Appl. Mater. Interfaces*, 2020, **12**, 51437-51447.
4. Z. Zheng, L. Yu, M. Gao, X. Chen, W. Zhou, C. Ma, L. Wu, J. Zhu, X. Meng, J. Hu, Y. Tu, S. Wu, J. Mao, Z. Tian and D. Deng, *Nat. Commun.*, 2020, **11**, 3315.
5. E. Cao, Z. Chen, H. Wu, P. Yu, Y. Wang, F. Xiao, S. Chen, S. Du, Y. Xie, Y. Wu and Z. Ren, *Angew. Chem. Int. Ed.*, 2020, **59**, 4154-4160.



6. B. Yang, Y. Du, M. Shao, D. Bin, Q. Zhao, Y. Xu, B. Liu and H. Lu, *J. Colloid Interf. Sci.*, 2022, **616**, 803-812.
7. Z. Liu, L. Zeng, J. Yu, L. Yang, J. Zhang, X. Zhang, F. Han, L. Zhao, X. Li, H. Liu and W. Zhou, *Nano Energy*, 2021, **85**, 105940.
8. D. Zhang, H. Zhao, B. Huang, B. Li, H. Li, Y. Han, Z. Wang, X. Wu, Y. Pan, Y. Sun, X. Sun, J. Lai and L. Wang, *ACS Cent. Sci.*, 2019, **5**, 1991-1997.
9. J. Jiao, N.-N. Zhang, C. Zhang, N. Sun, Y. Pan, C. Chen, J. Li, M. Tan, R. Cui, Z. Shi, J. Zhang, H. Xiao and T. Lu, *Adv. Sci.*, 2022, **9**, 2200010.
10. B. K. Barman, B. Sarkar and K. K. Nanda, *Chem. Commun.*, 2019, **55**, 13928-13931.
11. J.-X. Guo, D.-Y. Yan, K.-W. Qiu, C. Mu, D. Jiao, J. Mao, H. Wang and T. Ling, *J. Energy Chem.*, 2019, **37**, 143-147.
12. Q. Quan, Y. Zhang, F. Wang, X. Bu, W. Wang, Y. Meng, P. Xie, D. Chen, W. Wang, D. Li, C. Liu, S. Yip and J. C. Ho, *Nano Energy*, 2022, **101**, 107566.
13. H. Zhang, H. Su, M. A. Soldatov, Y. Li, X. Zhao, M. Liu, W. Zhou, X. Zhang, X. Sun, Y. Xu, P. Yao, S. Wei and Q. Liu, *Small*, 2021, **17**, 2105231.
14. Q. Shen, C. Du, Q. Chen, J. Tang, B. Wang, X. Zhang and J. Chen, *Mater. Today Phys.*, 2022, **23**, 100625.
15. X. Sun, X. Gao, J. Chen, X. Wang, H. Chang, B. Li, D. Song, J. Li, H. Li and N. Wang, *ACS Appl. Mater. Interfaces*, 2020, **12**, 48591-48597.
16. Q. Li, F. Huang, S. Li, H. Zhang and X.-Y. Yu, *Small*, 2022, **18**, 2104323.
